# Supplementary material
Source: bioRxiv or medRxiv preprint supplement (https://medrxiv.org/highwire/filestream/86036/field_highwire_adjunct_files/0/2020.06.14.20129957-1.pdf)

**Supplementary File**

**Age-dependent assessment of genes involved in cellular senescence, telomere and mitochondrial pathways in human lung tissue of smokers, COPD and IPF: Associations with SARS-CoV-2 COVID-19 ACE2-TMPRSS2-Furin-DPP4 axis**

Krishna P. Maremanda<sup>1</sup>, Isaac K. Sundar<sup>1</sup>, Dongmei Li<sup>2</sup> and Irfan Rahman<sup>1\*</sup>

<sup>1</sup>Department of Environmental Medicine, <sup>2</sup> Department of Clinical & Translational Research,  
University of Rochester Medical Center,  
Rochester, NY, USA

Supplementary figure 1.

**Young (Smokers vs. Non-smokers)**

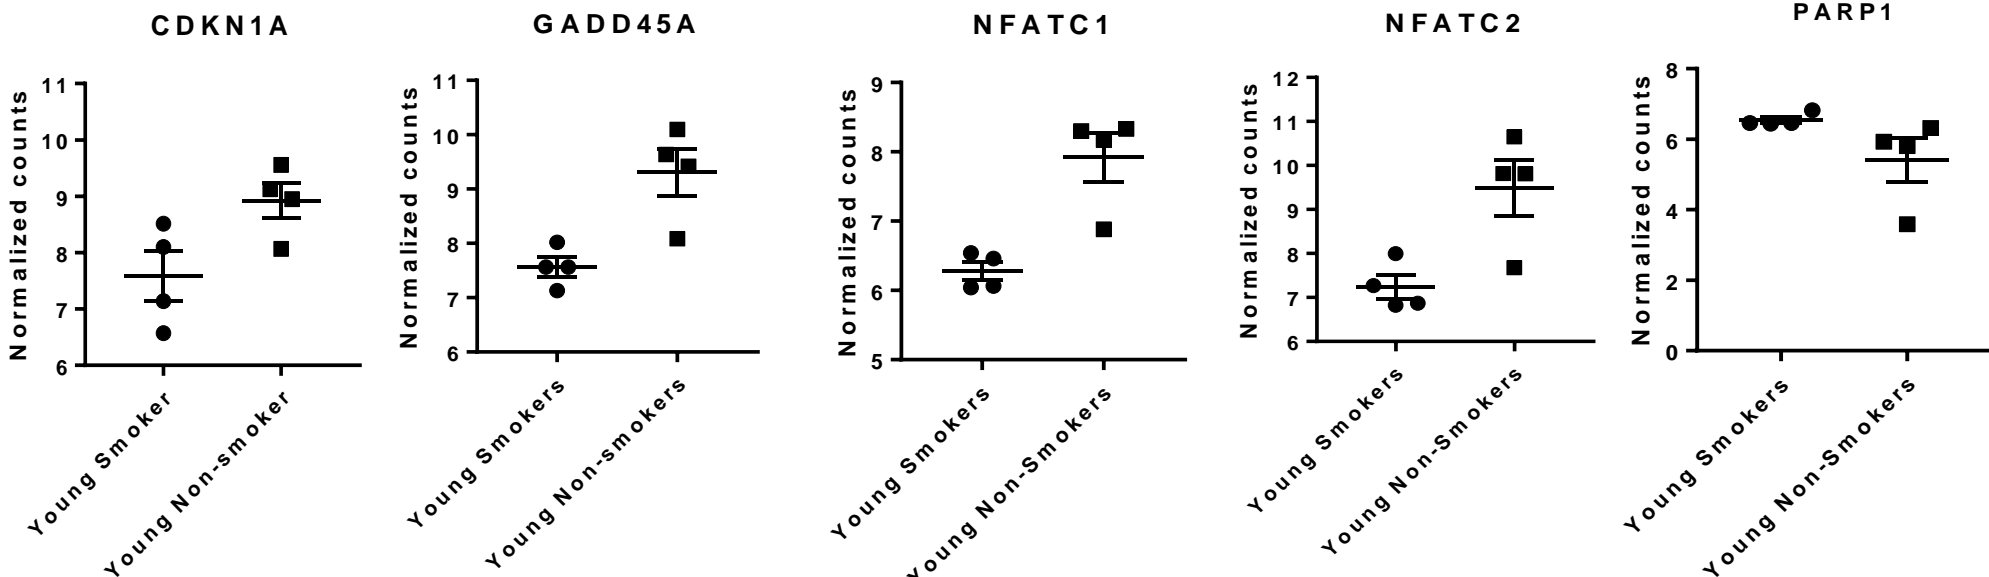

**Young (Smokers vs. COPD)**

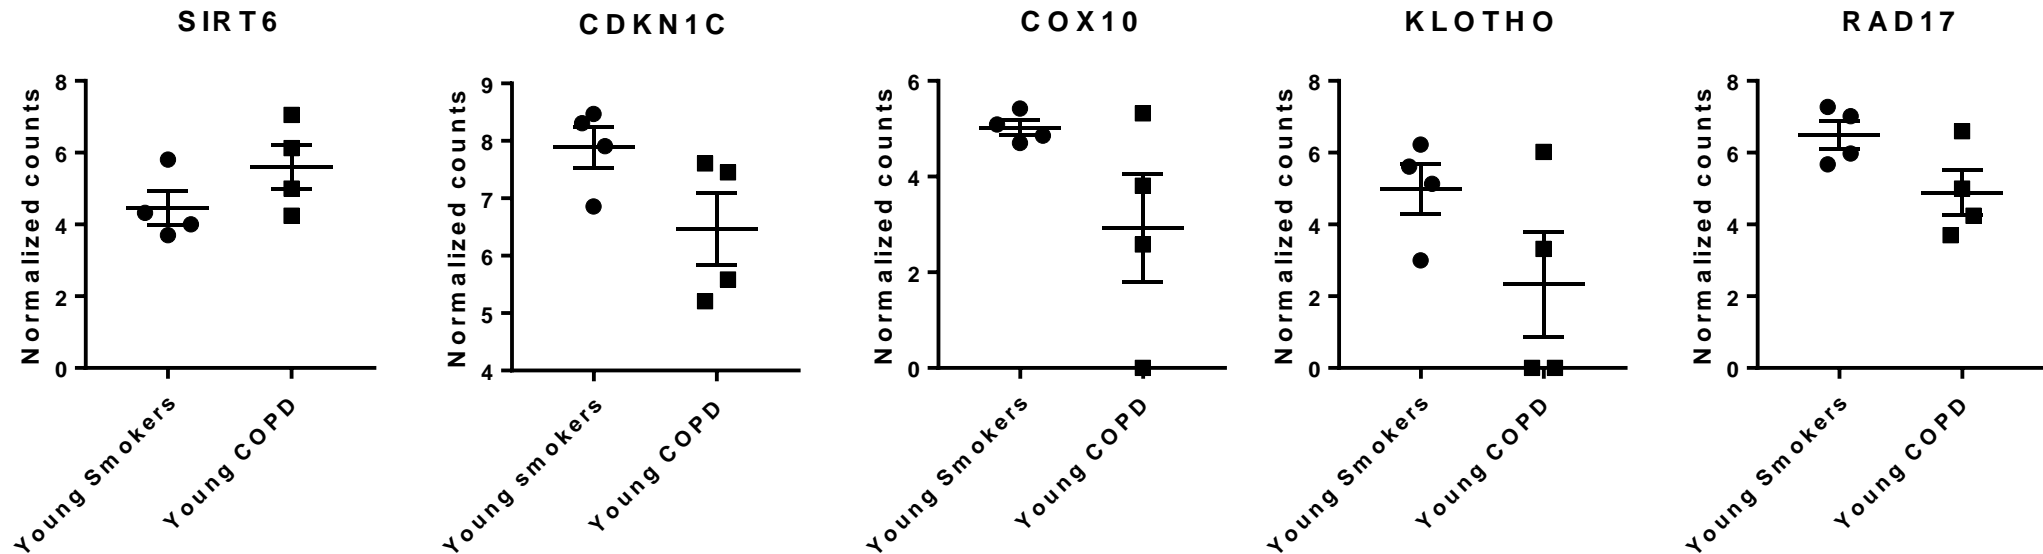

**Young (COPD vs. Non-smokers)**

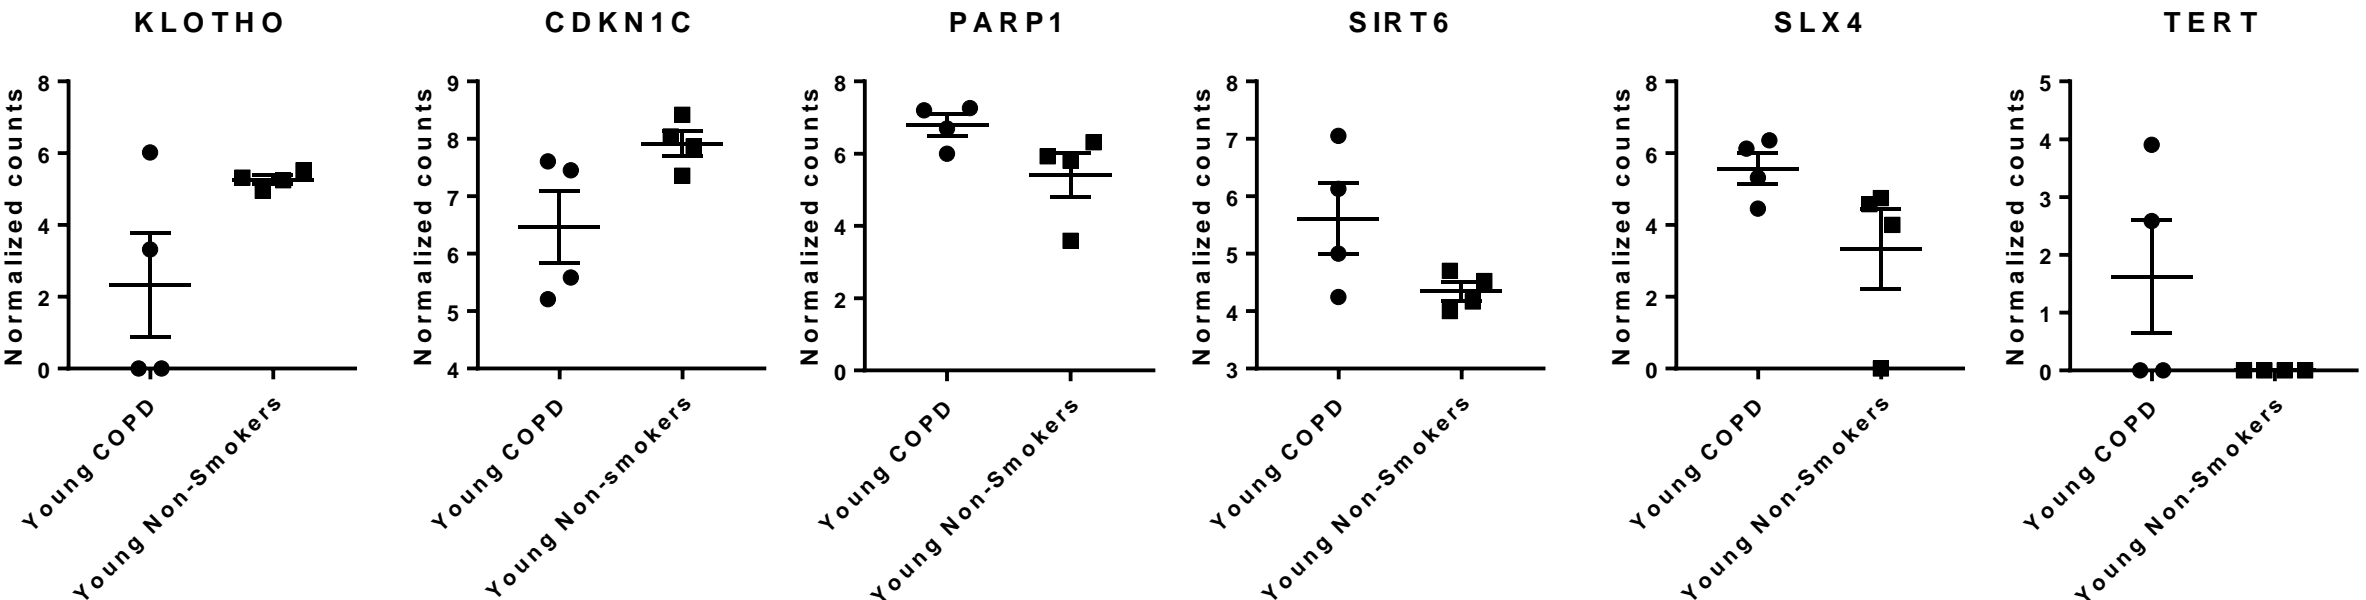

Supplementary figure 2.

**Old (Smokers vs. Non-smokers)**

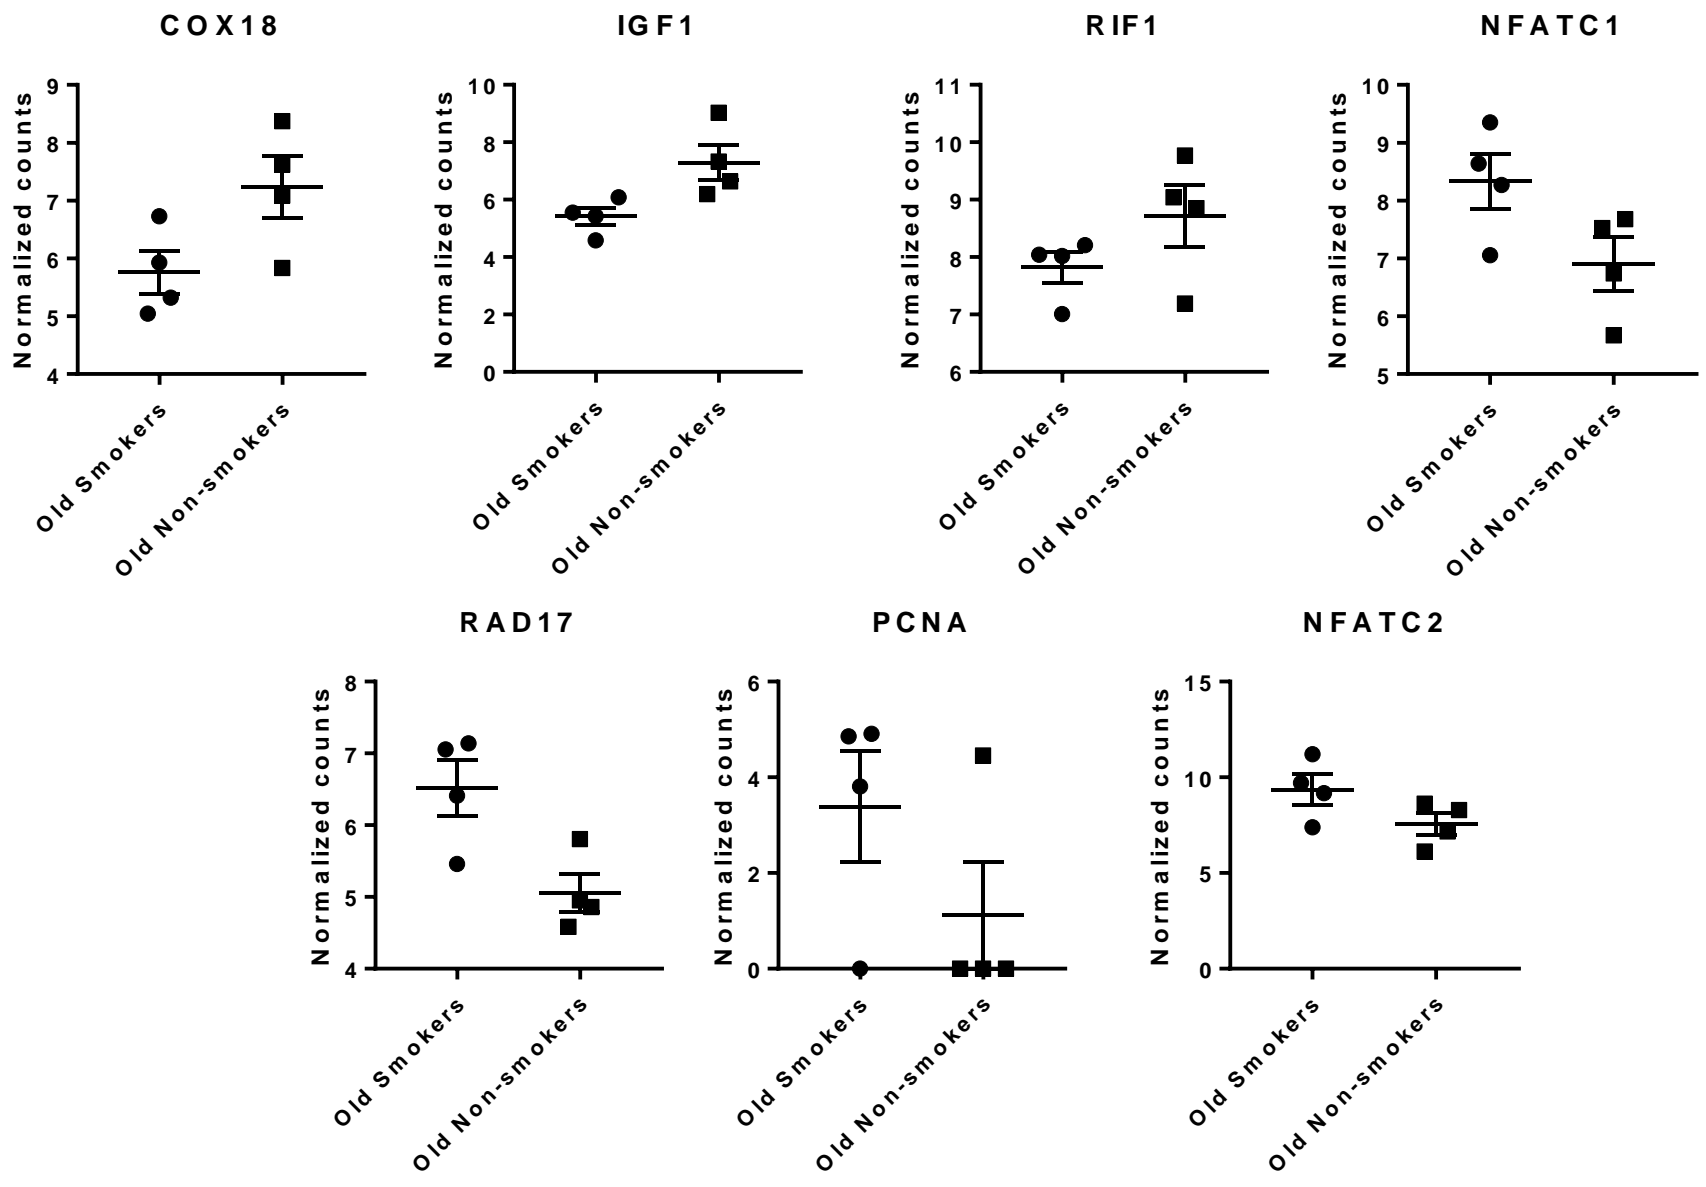

**Old (Smokers vs. COPD)**

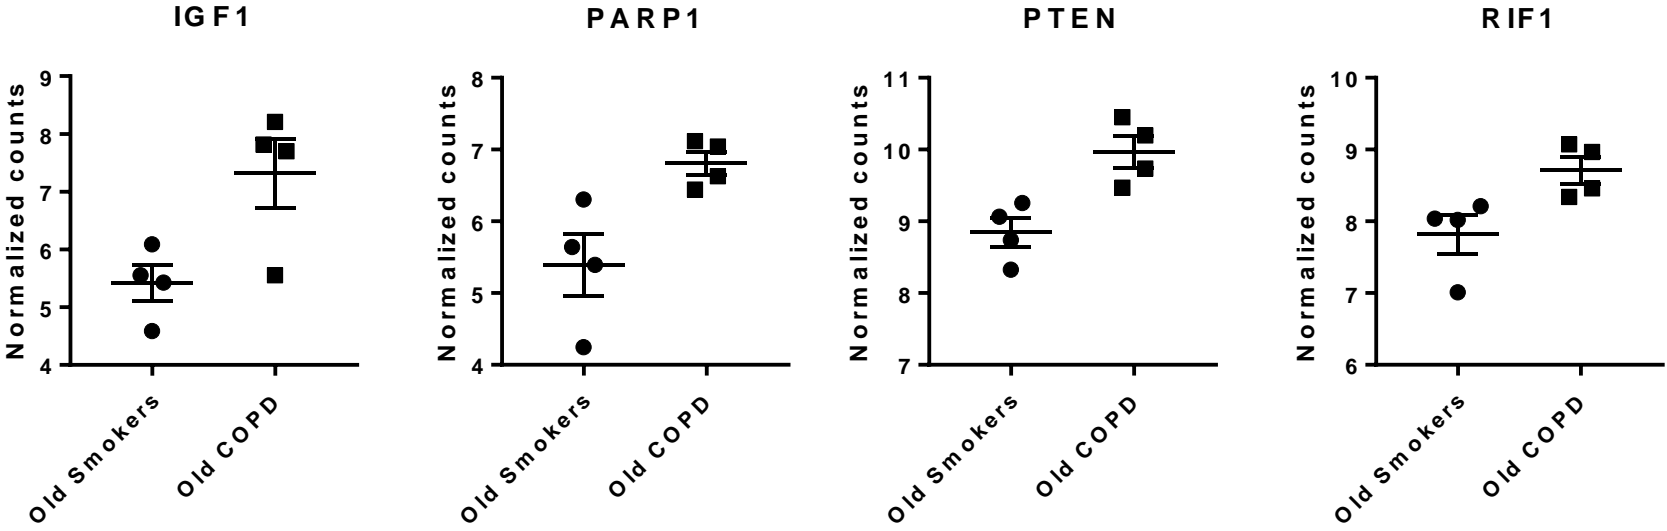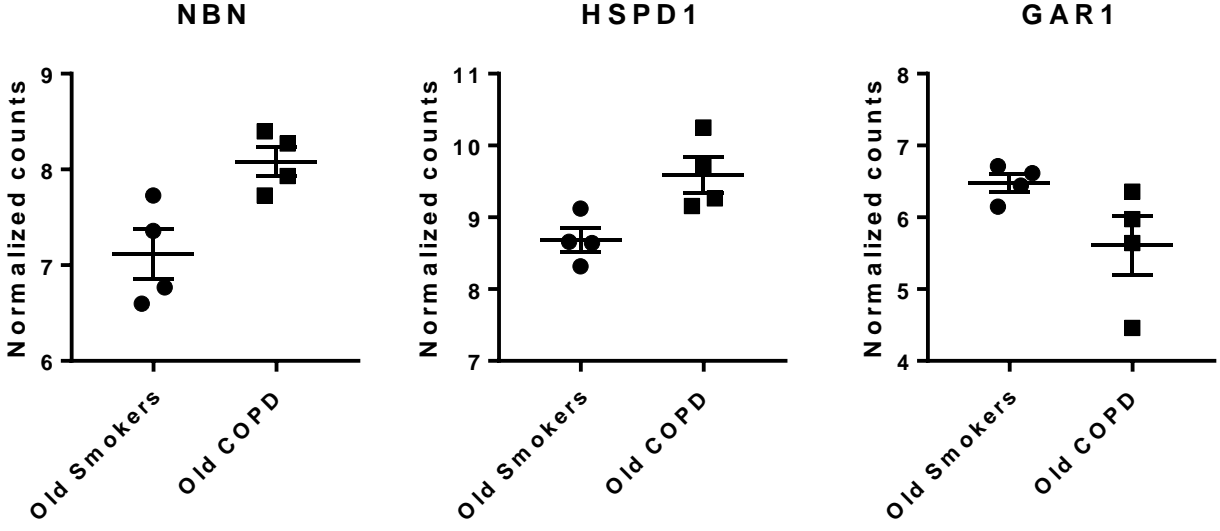

**Old (COPD vs. Non-smokers)**

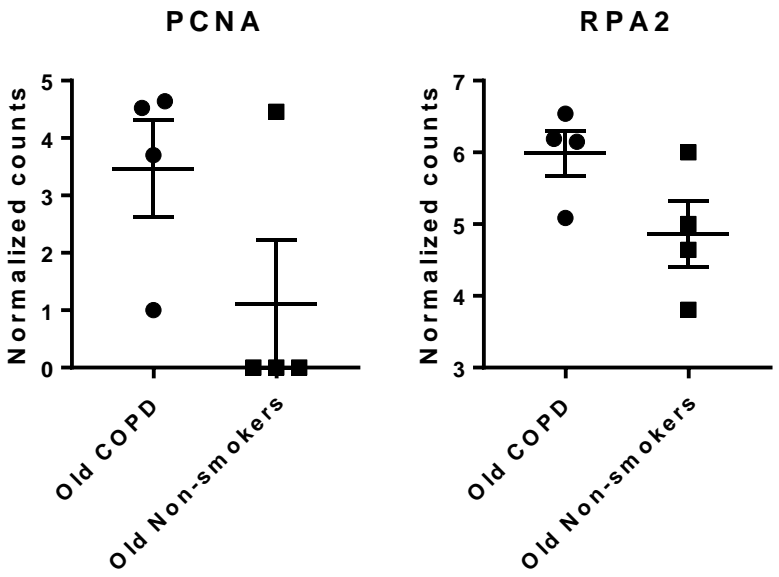

Supplementary figure 4.

**Young Non-smokers vs. Old Non-smokers**

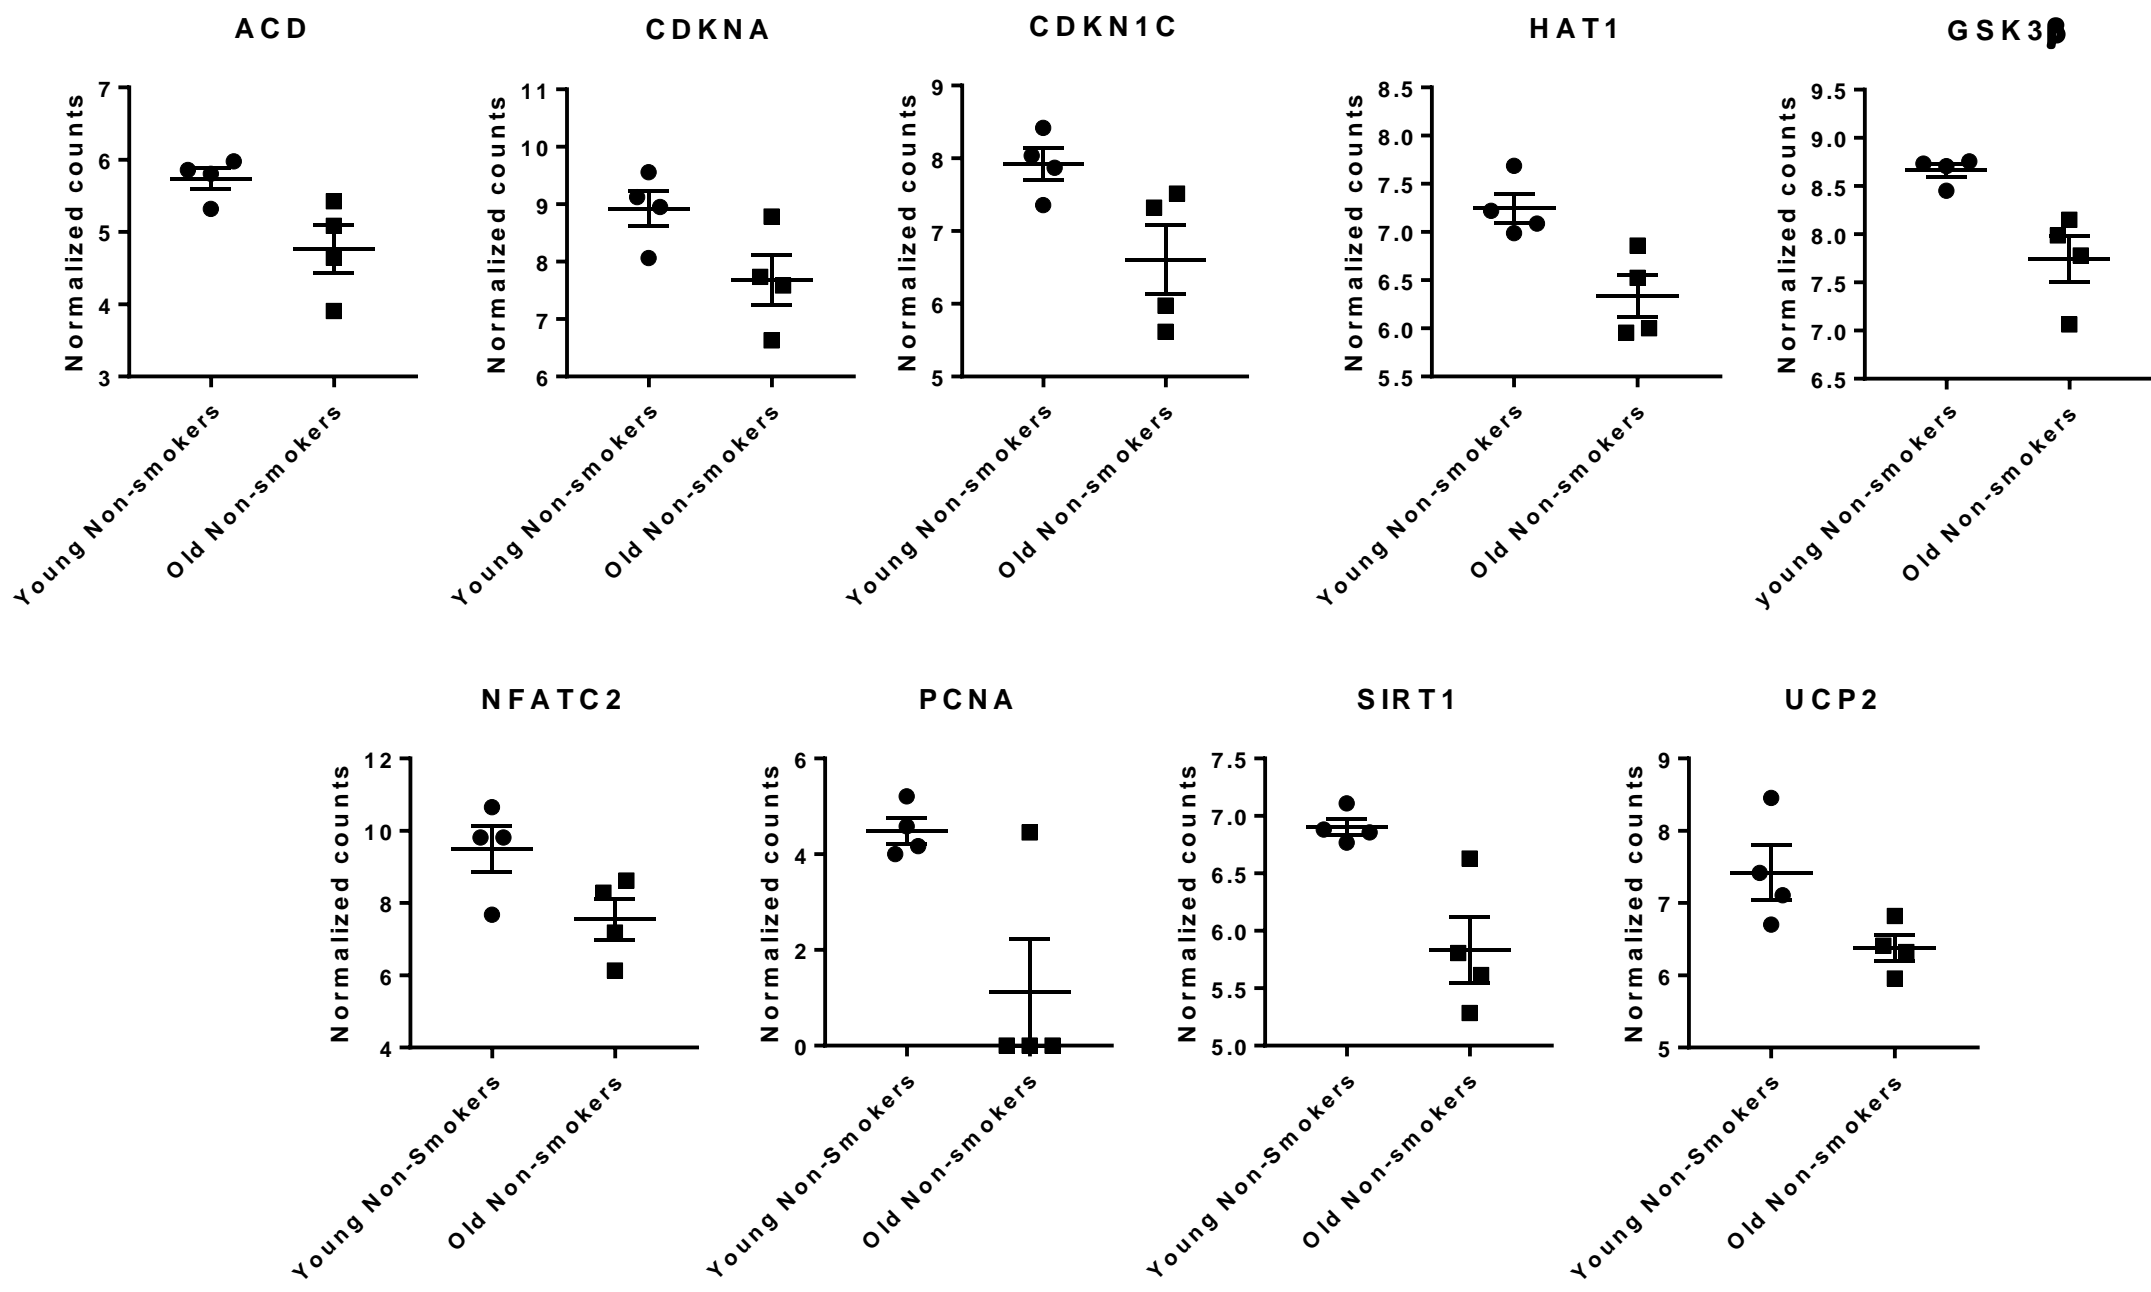

Supplementary figure 5.

**Young Smokers vs. Old Smokers**

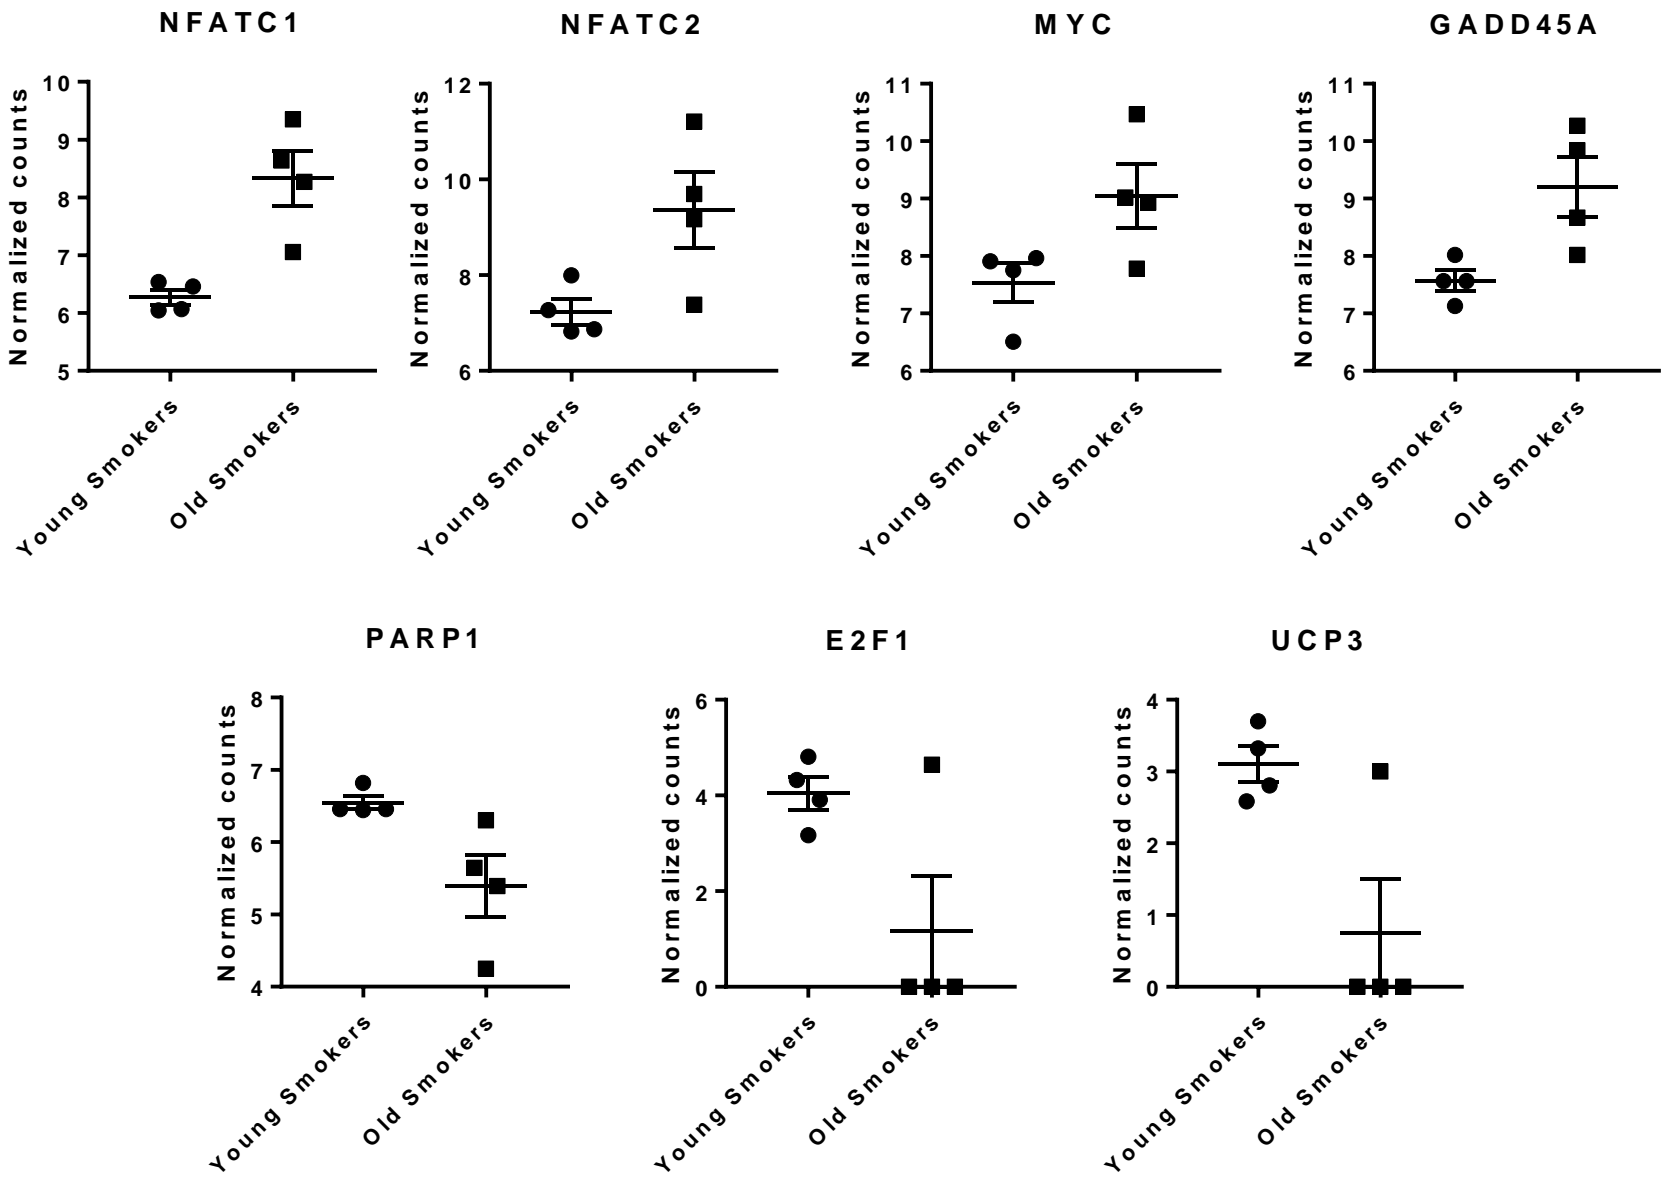

Supplementary figure 6.

**Young COPD vs. Old COPD**

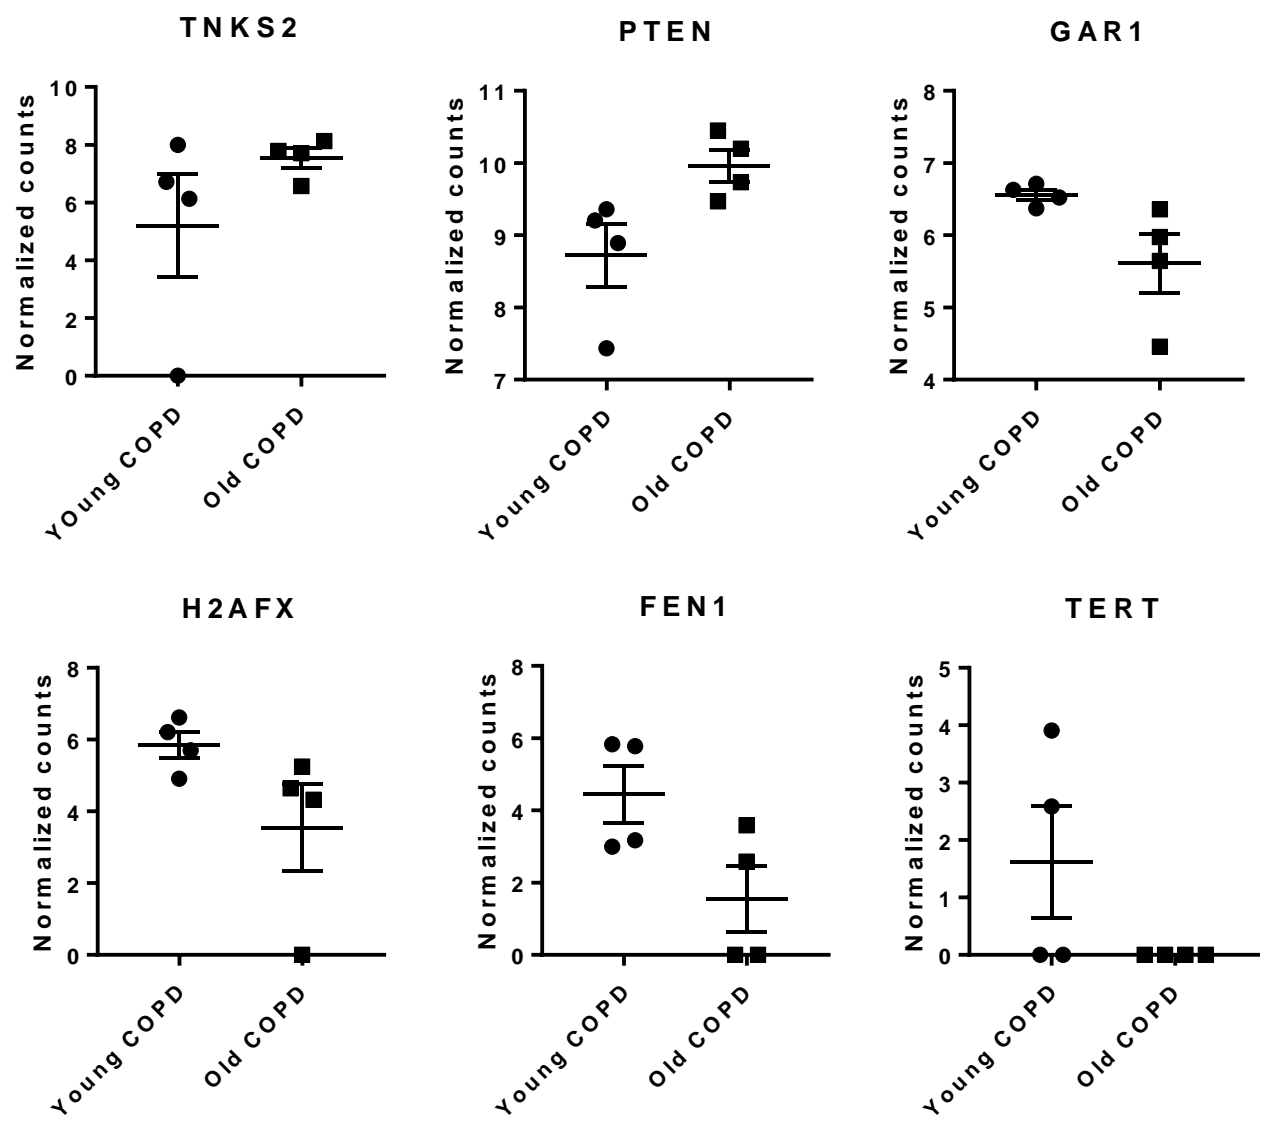

Supplementary figure 7.

**Smokers vs. Non-smokers**

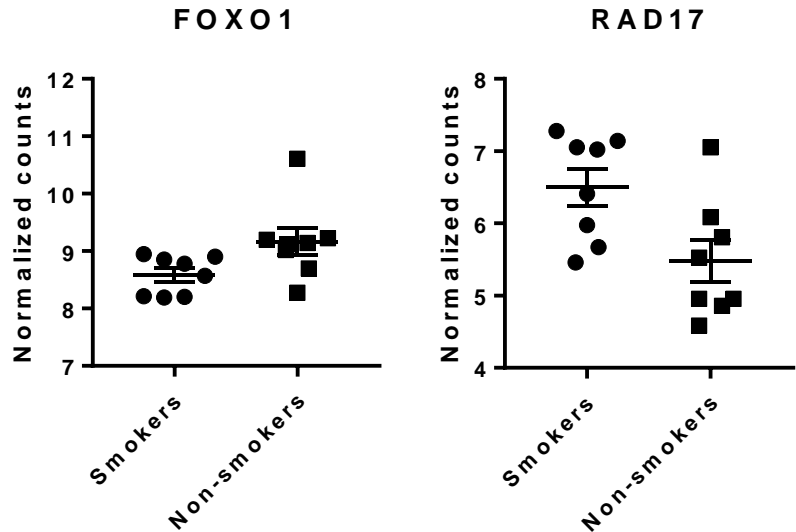

**Smokers vs. COPD**

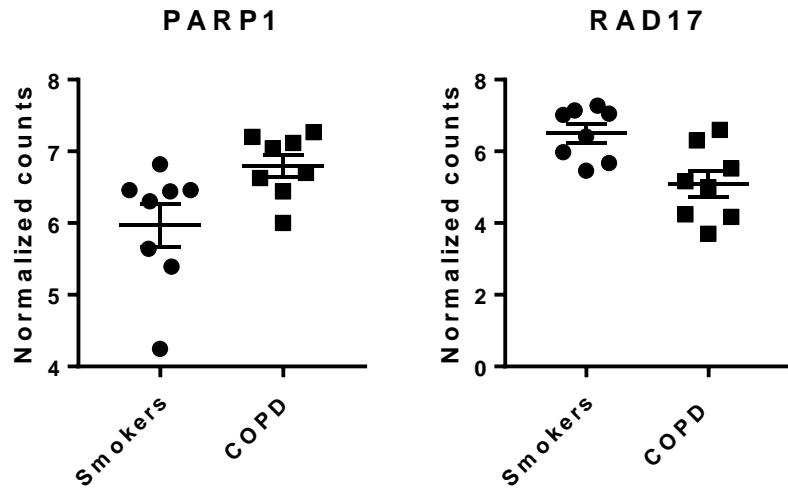

**COPD vs. Non-smokers**

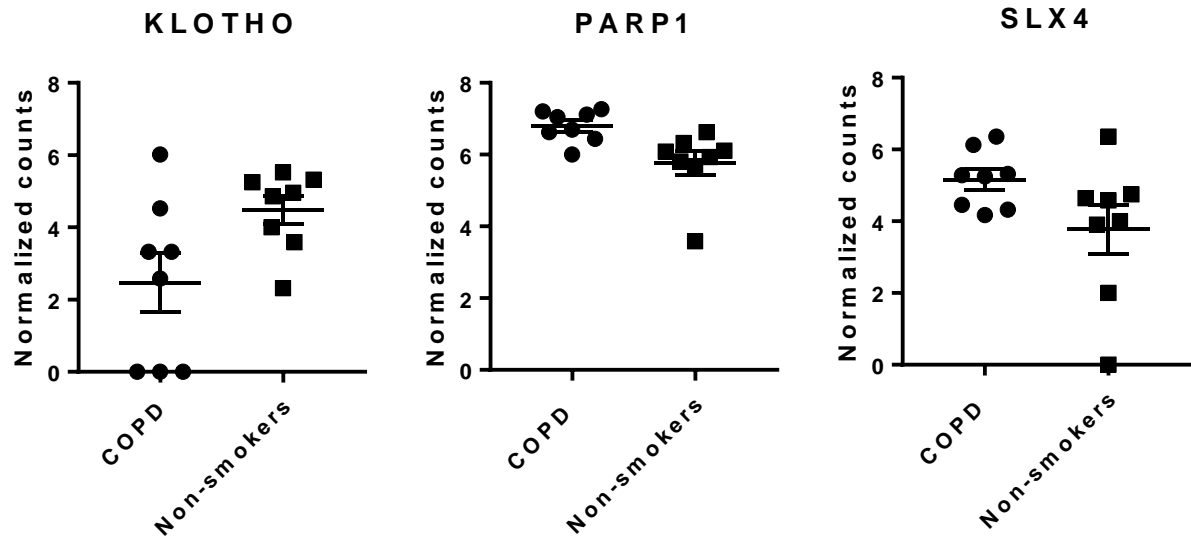



Supplementary figure 8.

**Young (COPD vs. IPF)**

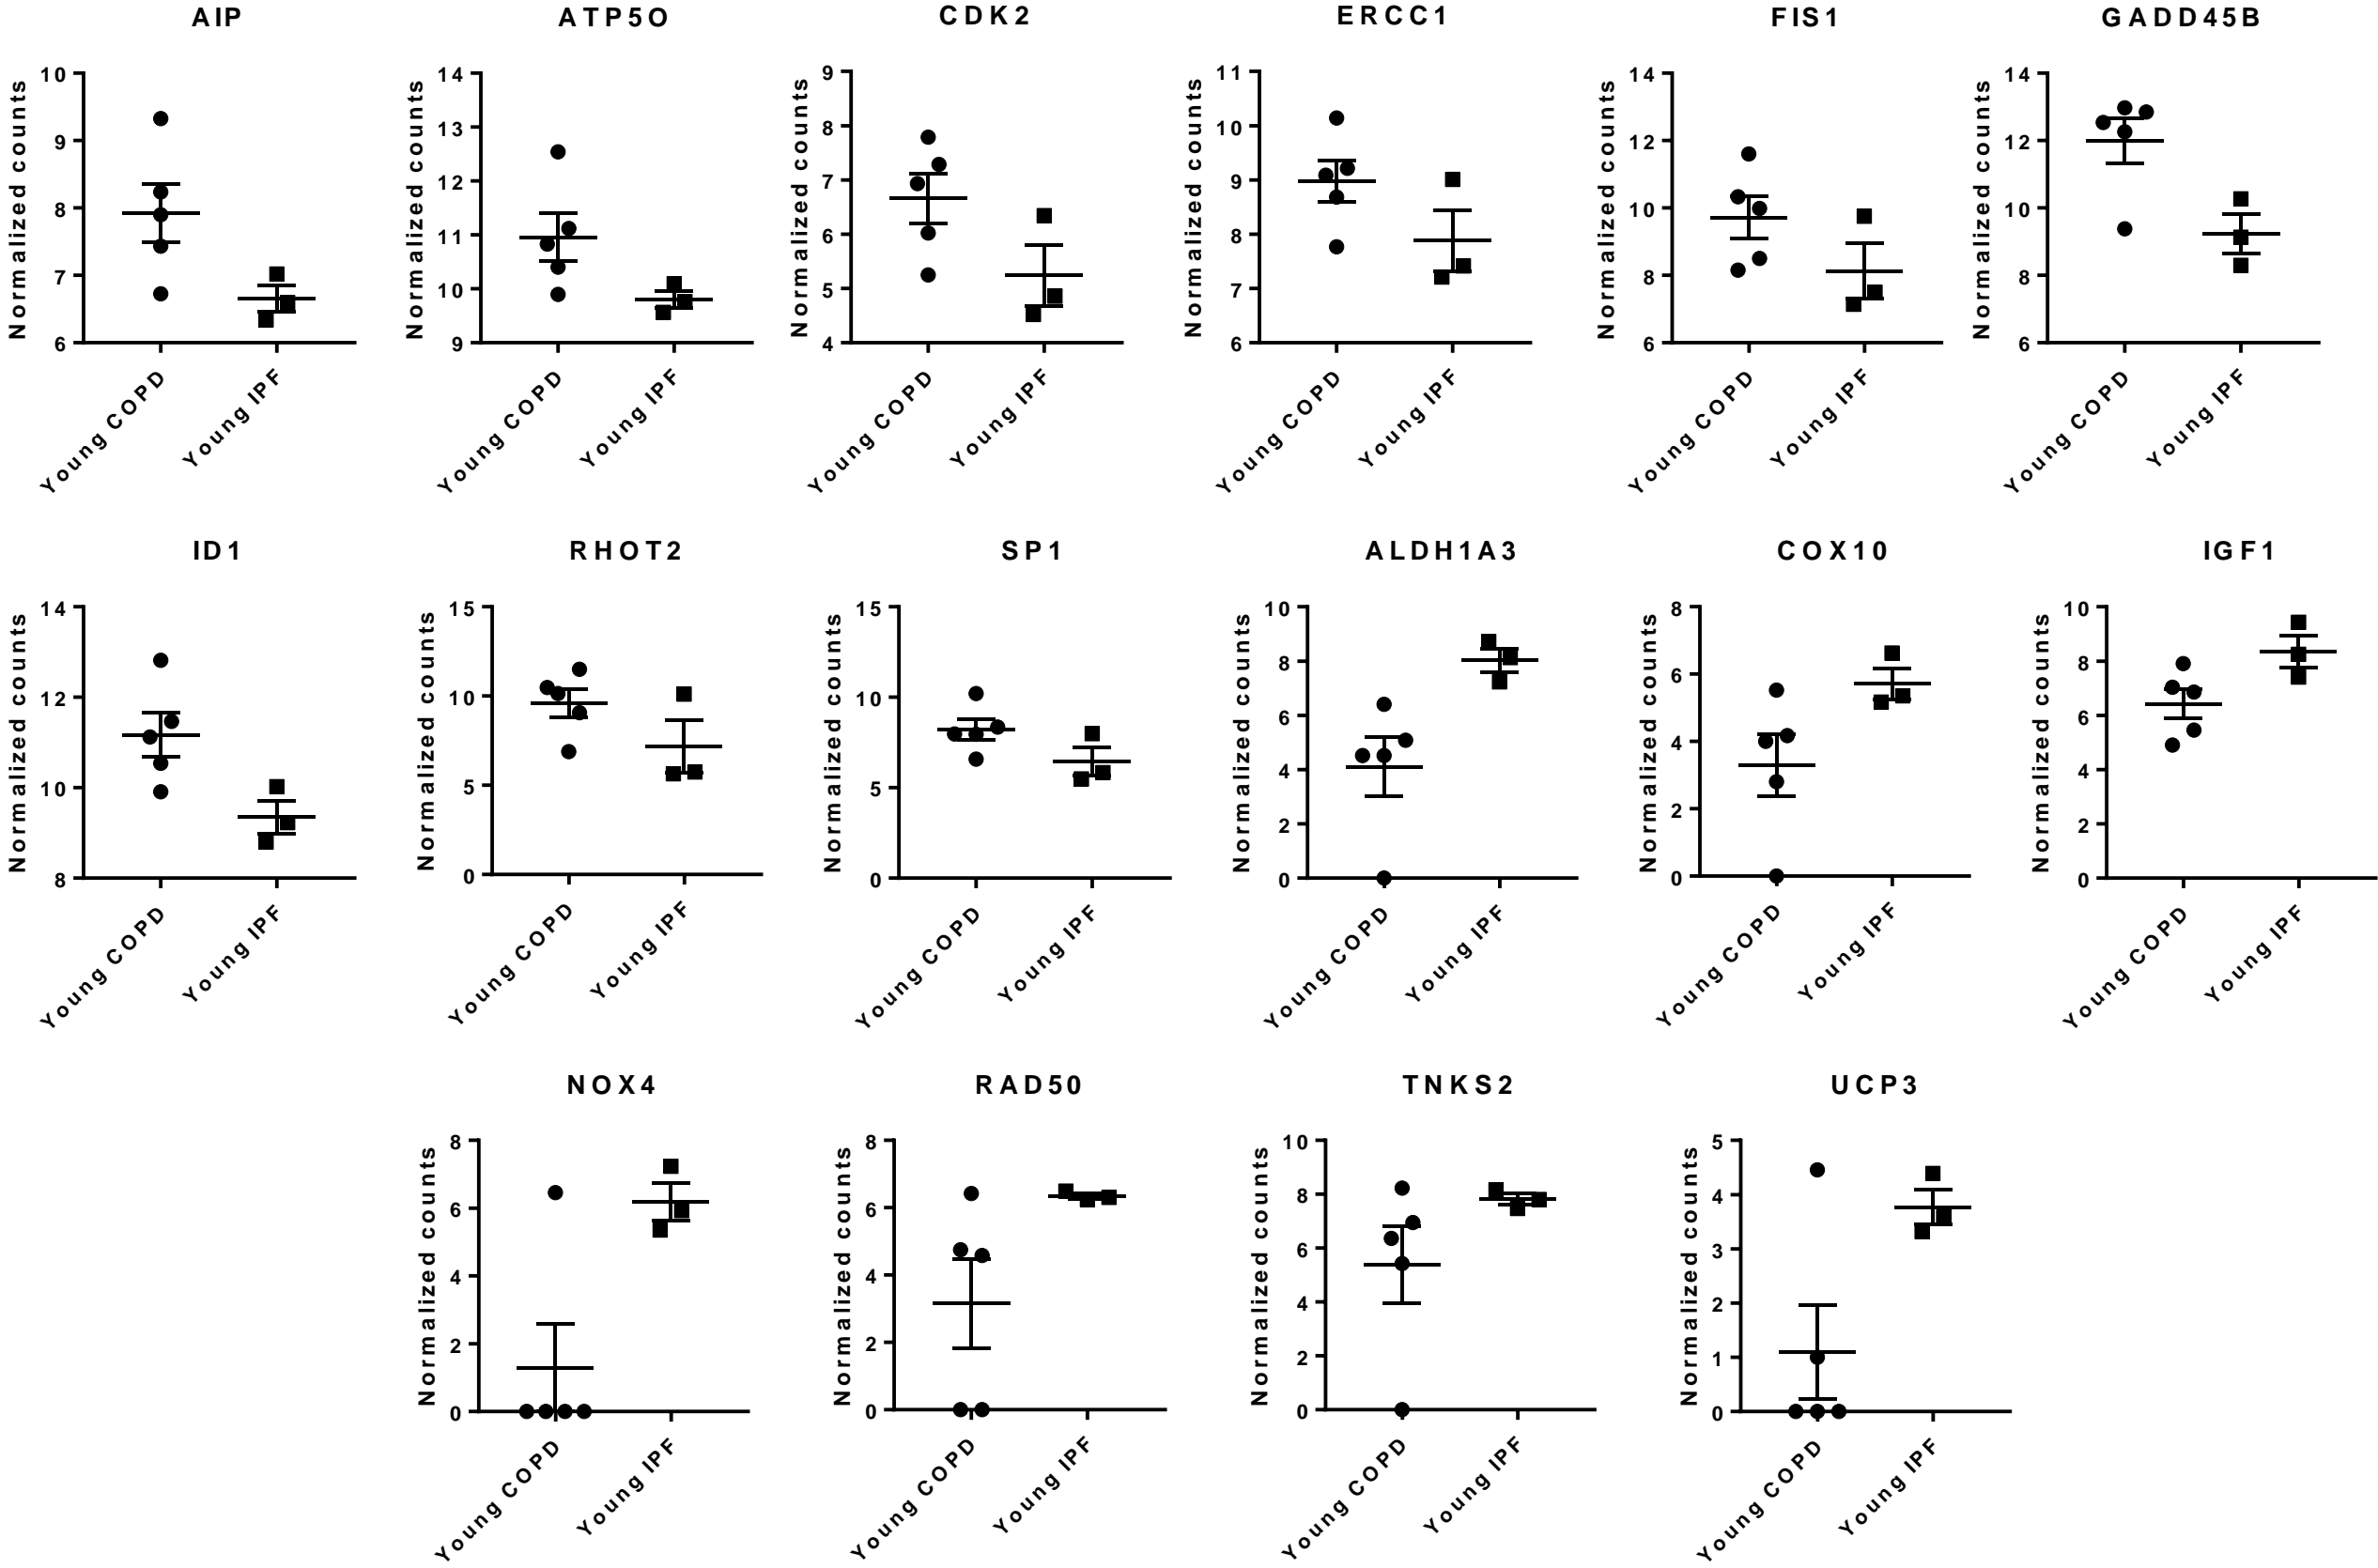

**Old (COPD vs. IPF)**

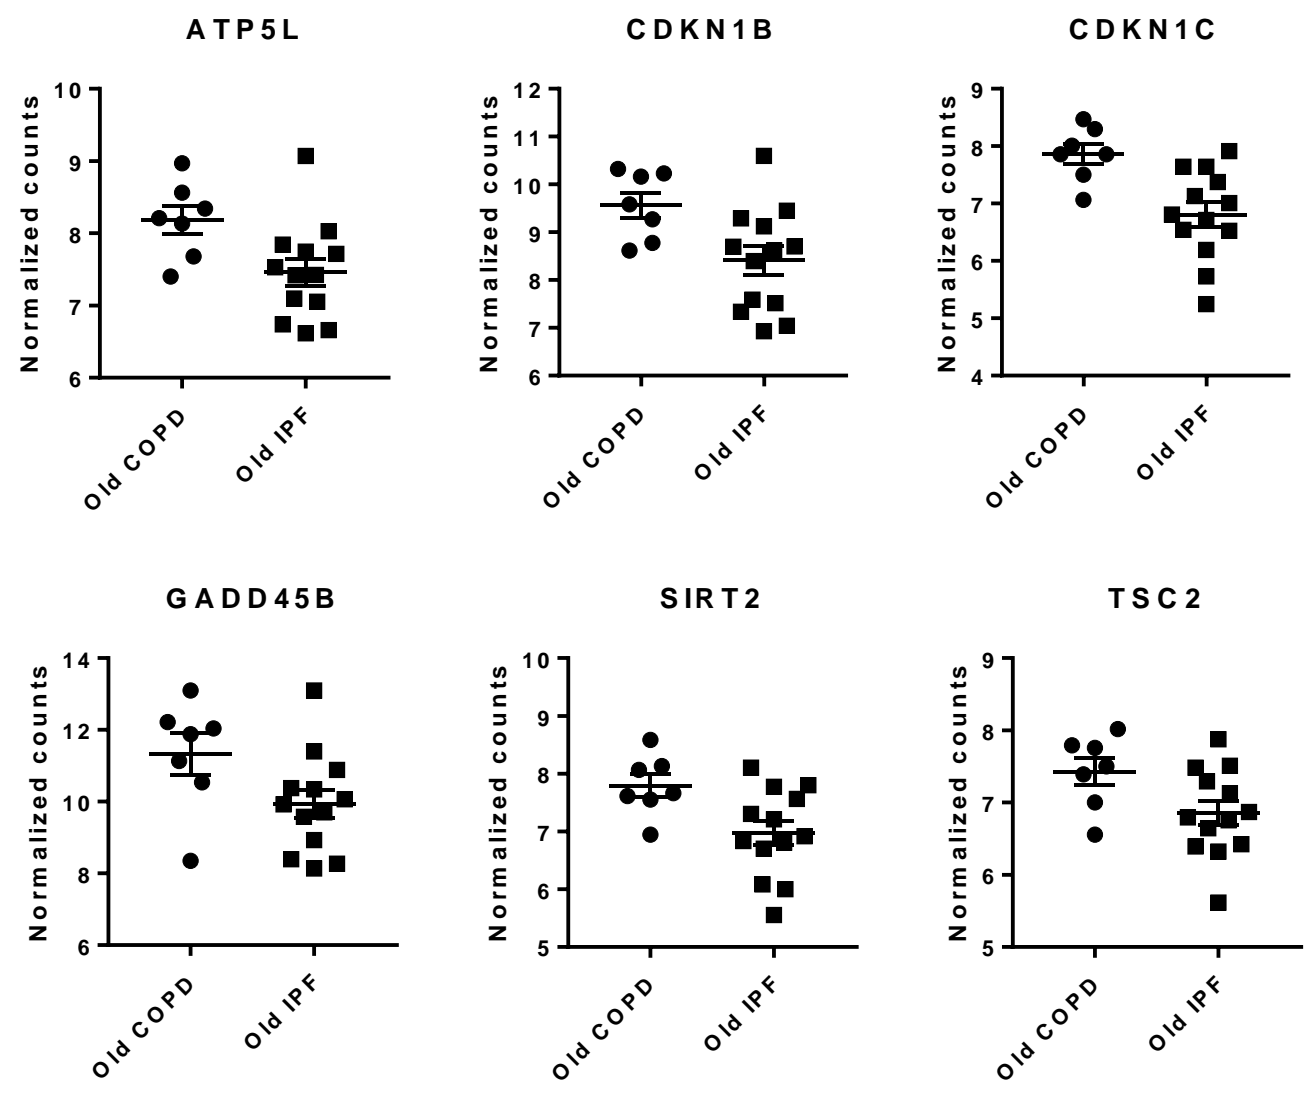

Supplementary Figure 10.

Full unedited gels/blots for Fig. 10 (original and unprocessed)

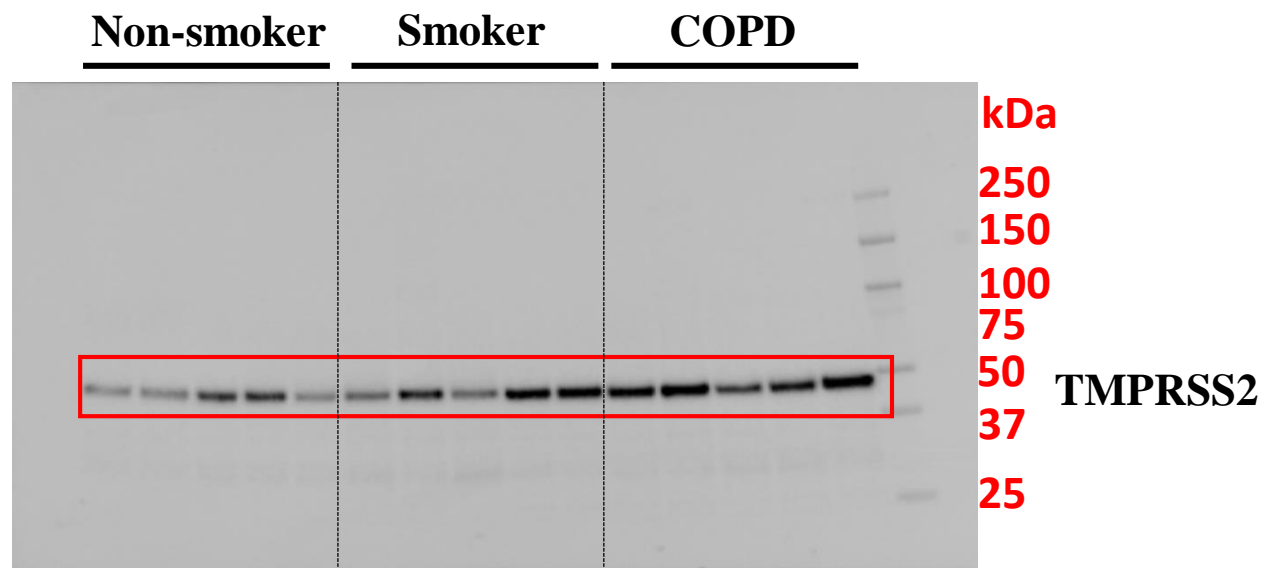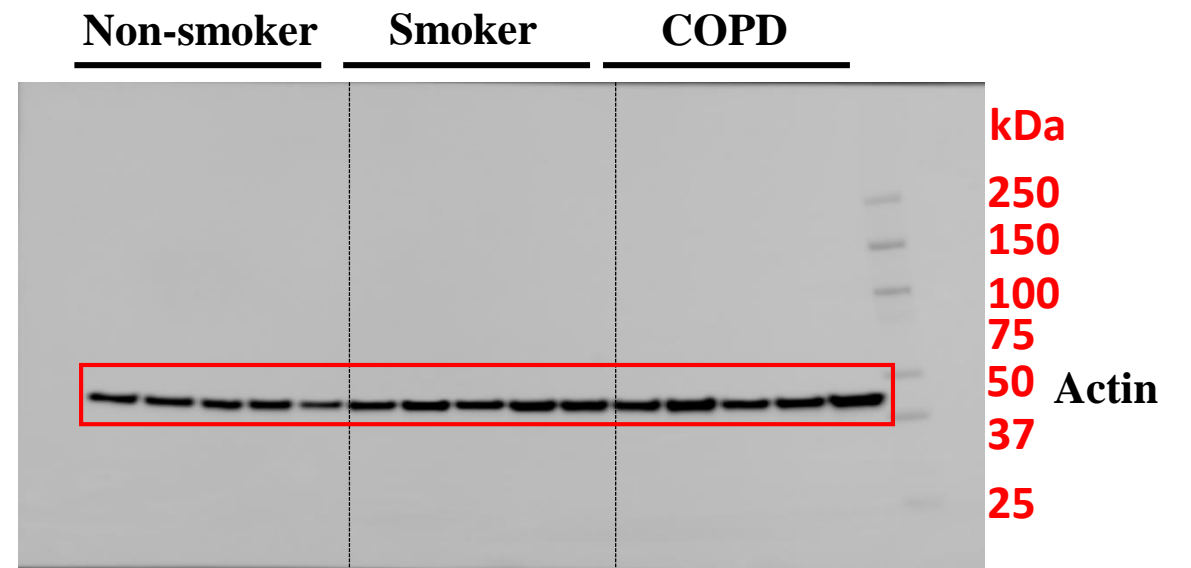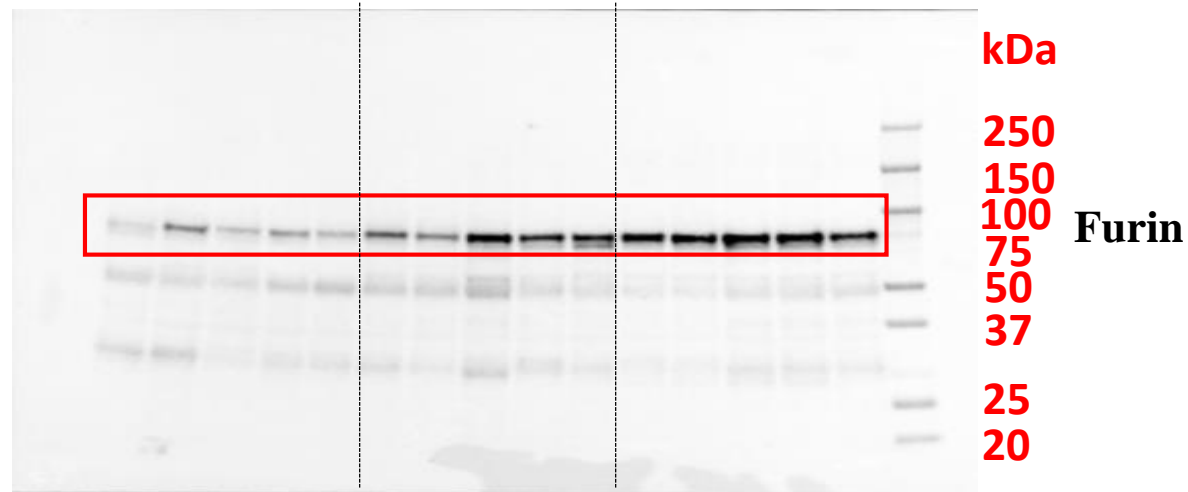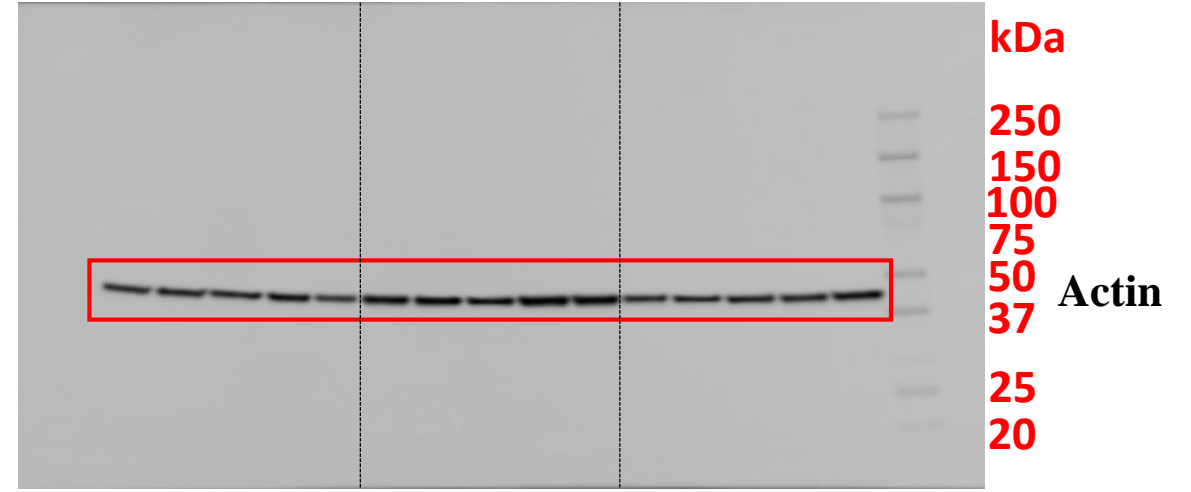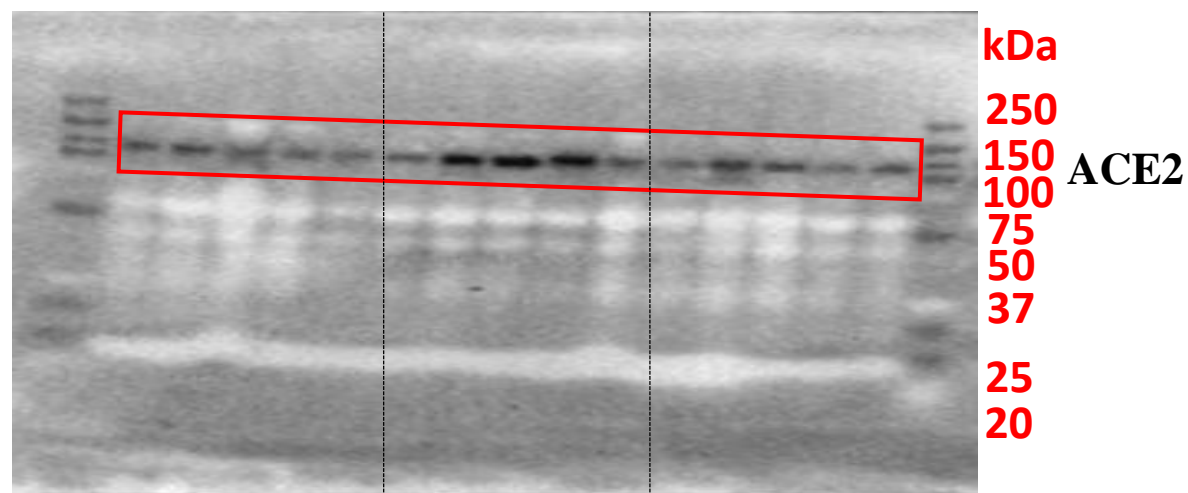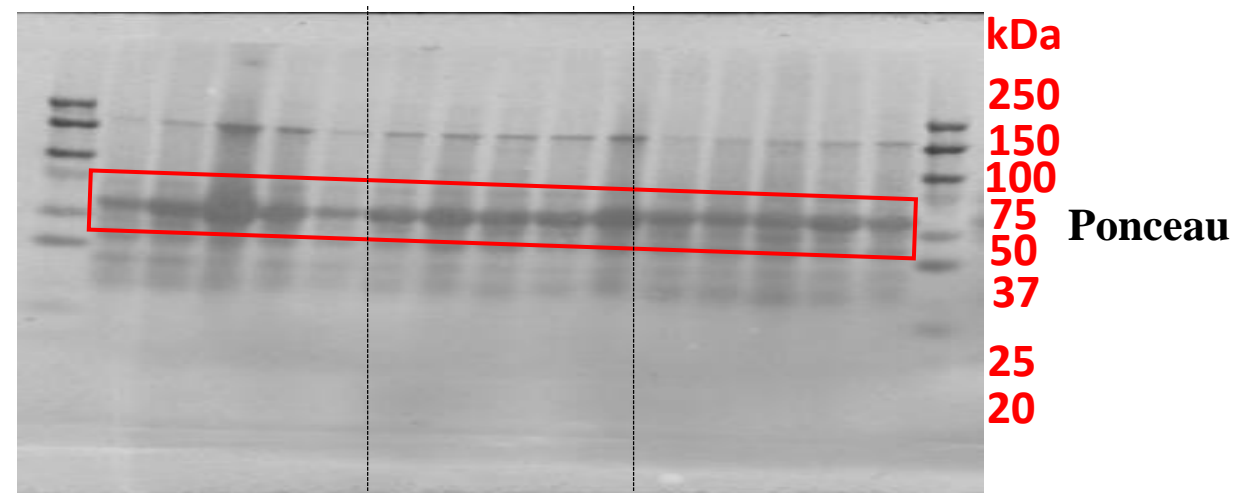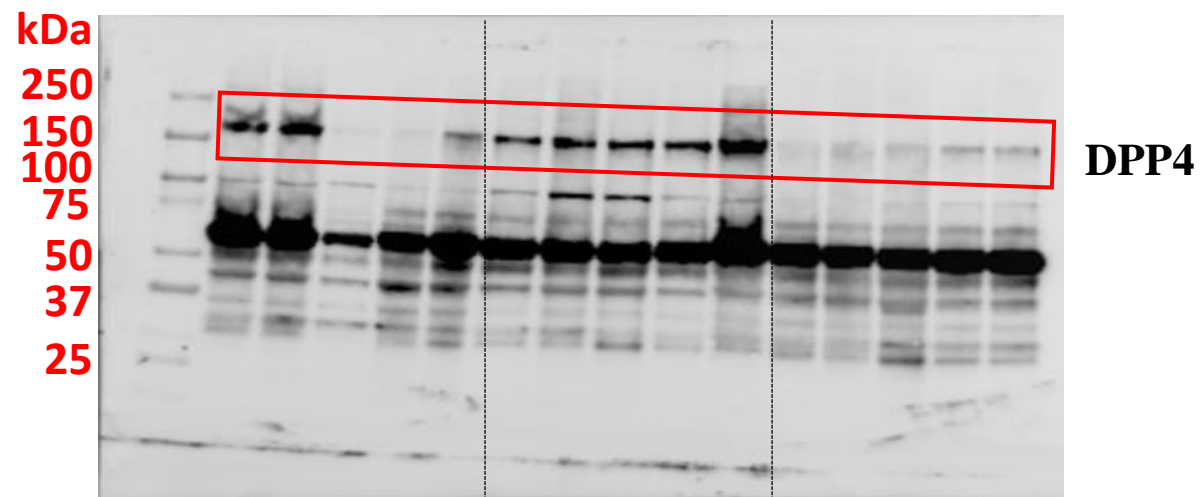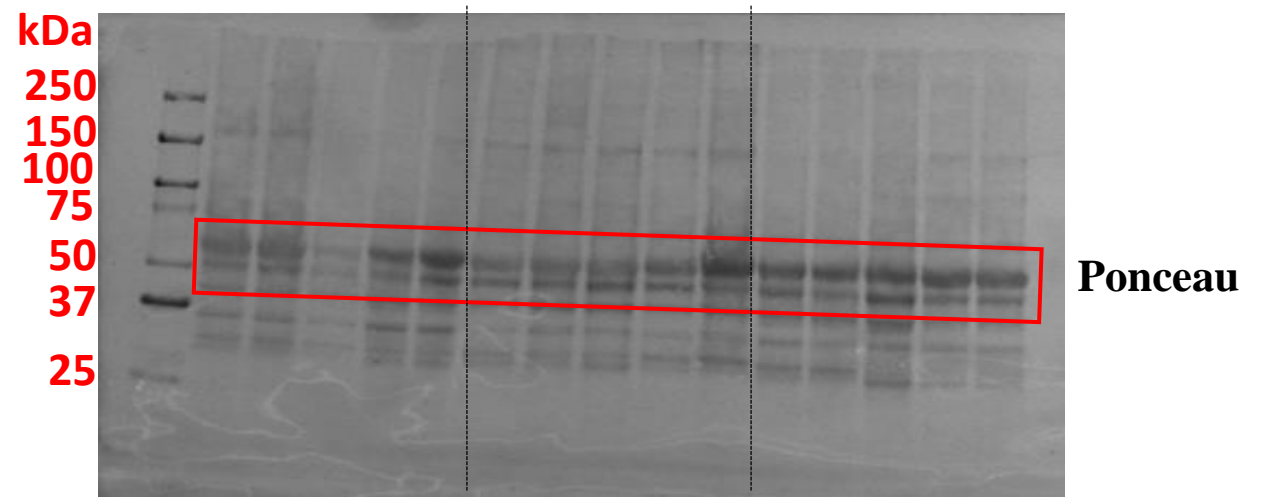

Supplementary Figure 11.

Full unedited gels/blots for Fig. 11 (original and unprocessed)

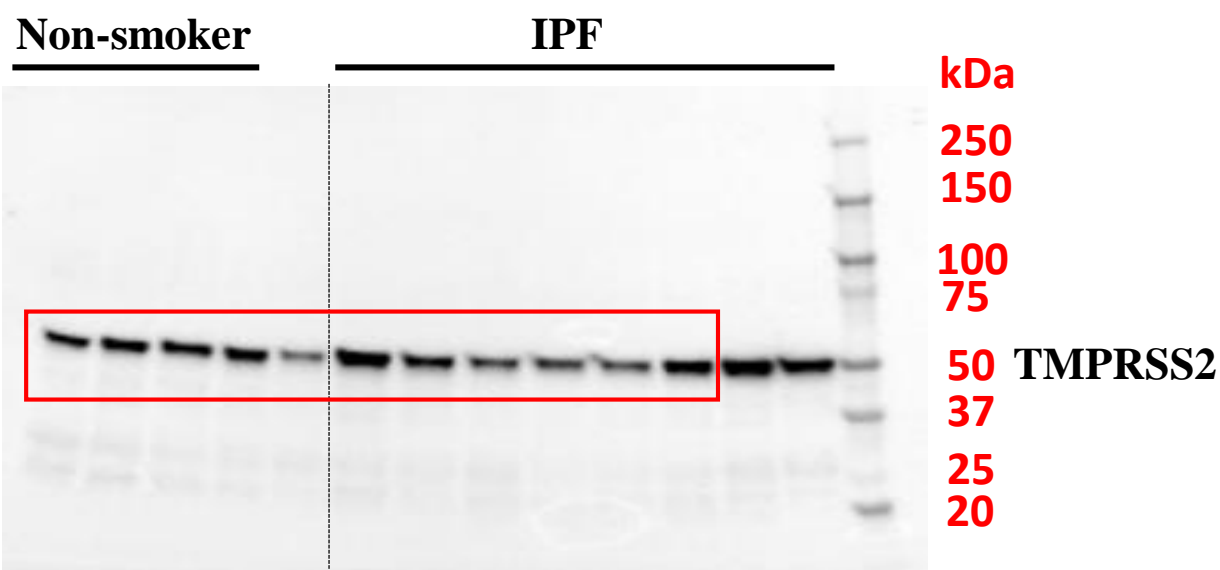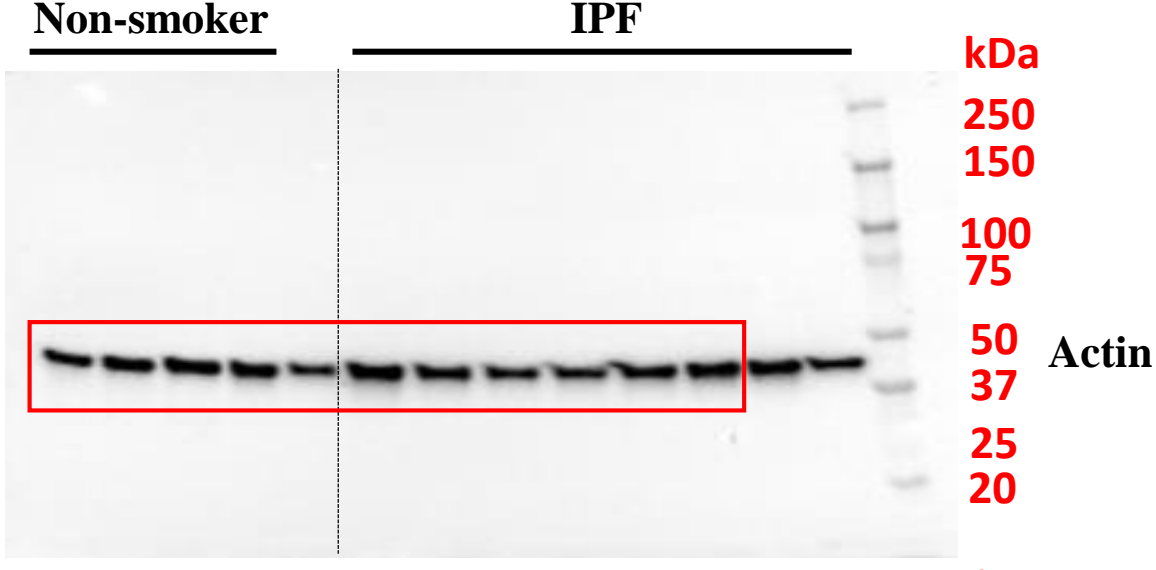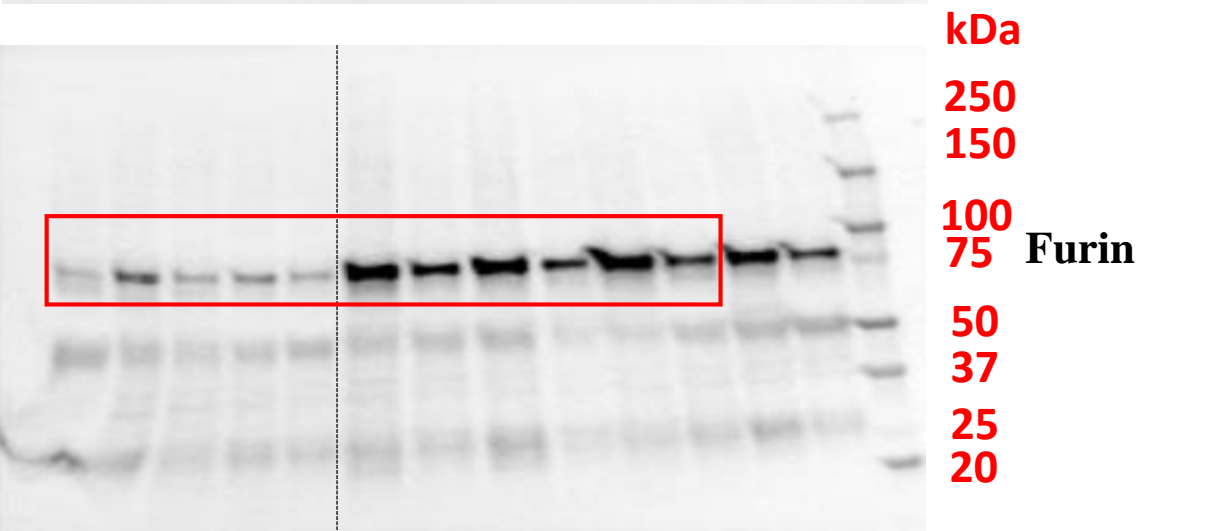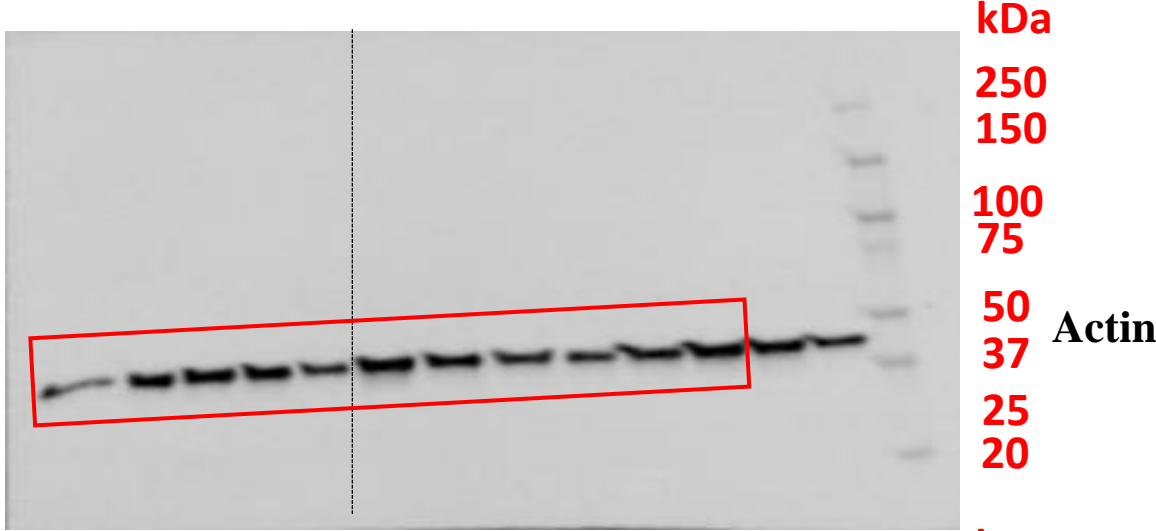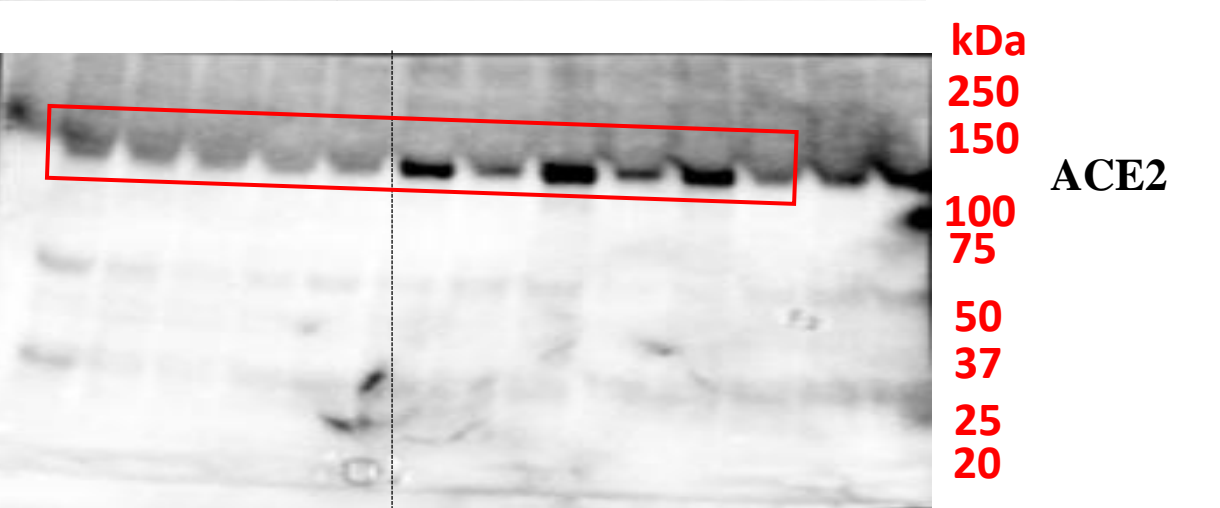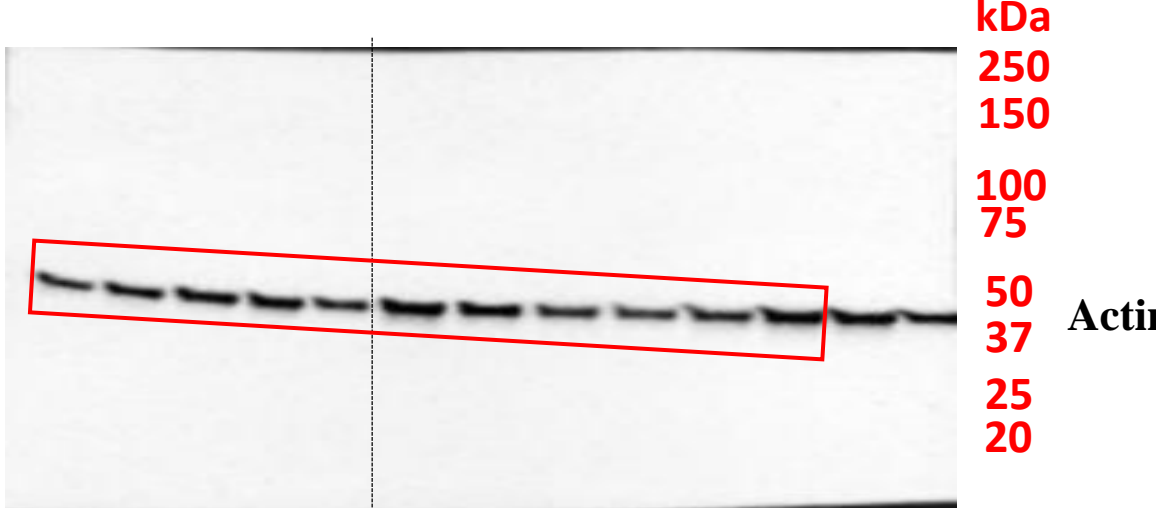

Supplement: Supplementary file [file 2020.06.14.20129957-1.pdf]
